# Supplementary material for: Beta cell dysfunction occurs independently of insulitis in type 1 diabetes pathogenesis
Source: PubMed Central journal article supplement — bioRxiv. 2025 Mar 1:2024.12.29.630665. Originally published 2024 Dec 29. Preprint. [Version 3] doi: 10.1101/2024.12.29.630665 (PMC11703223; doi:10.1101/2024.12.29.630665), 2025-03-01
Supplement: NIHPP2024.12.29.630665V1-supplement-1.pdf [file NIHPP2024.12.29.630665V1-supplement-1.pdf]

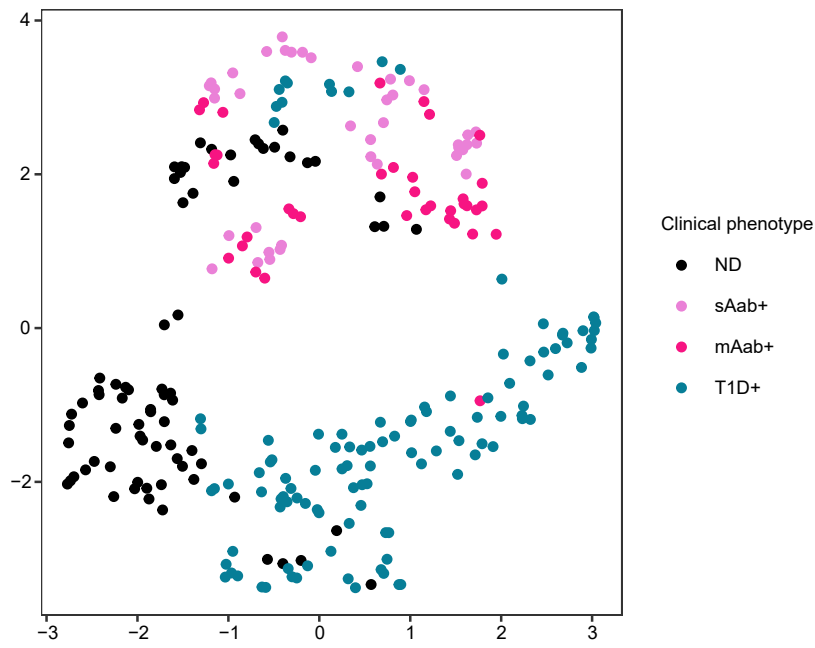

**Supplementary Figure 1: UMAP of laser-capture microdissected islets.** Uniform manifold approximation and projection (UMAP) plot showing clustering of 260 islets. Each dot represents an islet and each clinical phenotype is plotted with different color.

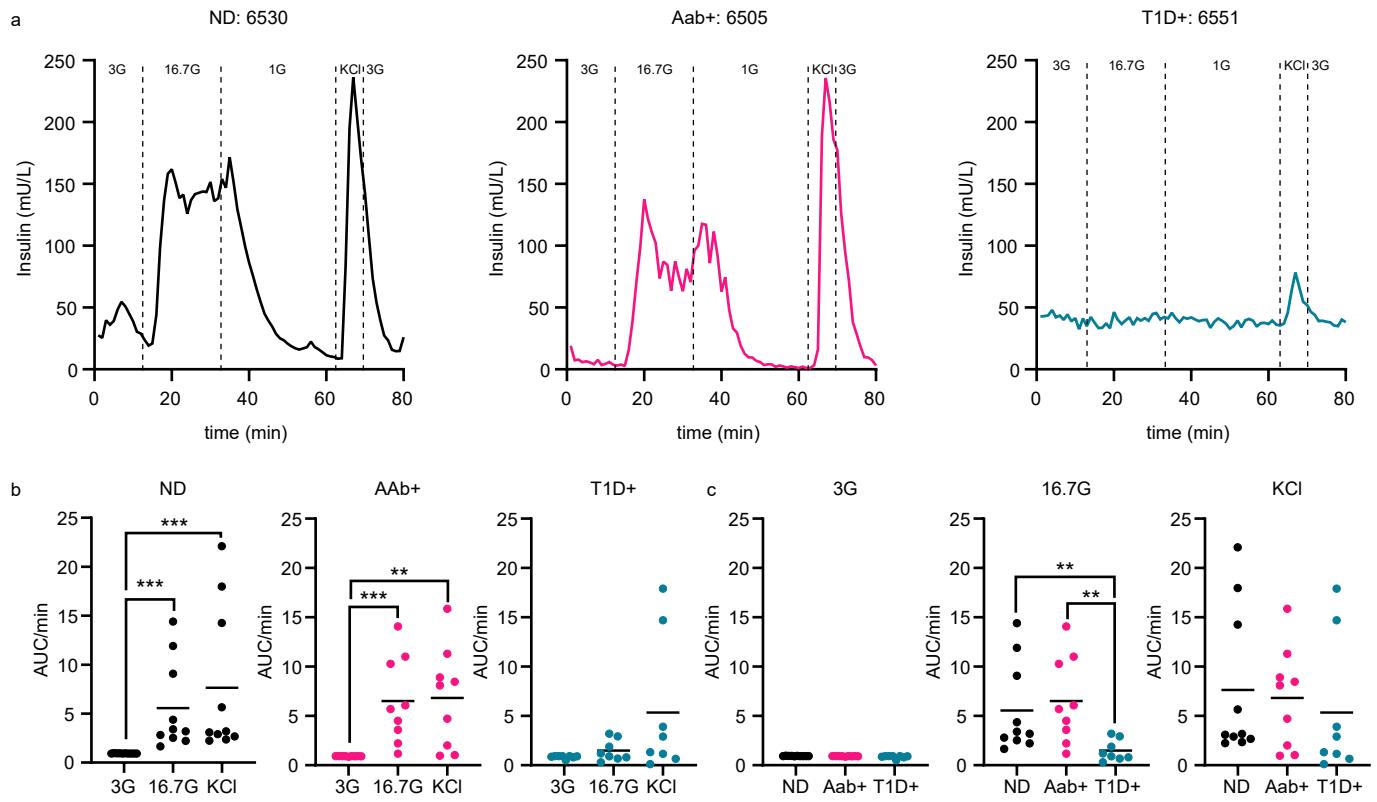

**Supplementary Figure 2: Beta cell insulin secretion decreases after T1D diagnosis.** a) Representative insulin secretion traces from ND, Aab+, and T1D+ donors to low glucose (3 mM), high glucose (16.7 mM) and KCl (30 mM). b) Quantification of AUC per minute of insulin secretion of live pancreas tissue slices from ND (n=10), Aab+ (n=9), and T1D+ (n=8) donors. Each dot represents one donor. c) Quantification of AUC per minute of insulin secretion of the donor groups during different glucose stimulations. One-way ANOVA with multiple comparisons run on log10 transformed data, \*\*P<0.01, \*\*\*P<0.001.

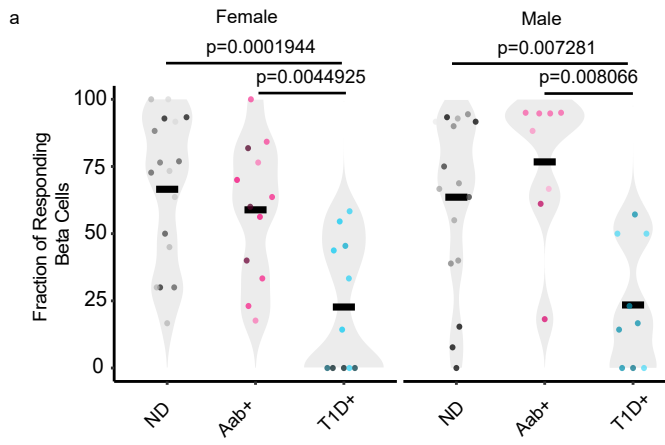

**Supplementary Figure 3: Beta cell dysfunction is not driven by sex differences.** The fraction of beta cells responding to high glucose within each islet in male and female donors recorded from ND, Aab+, and T1D+ cases. Each dot represents an islet recording. Center line indicates the mean. One-way ANOVA with multiple comparisons.





## Aab+

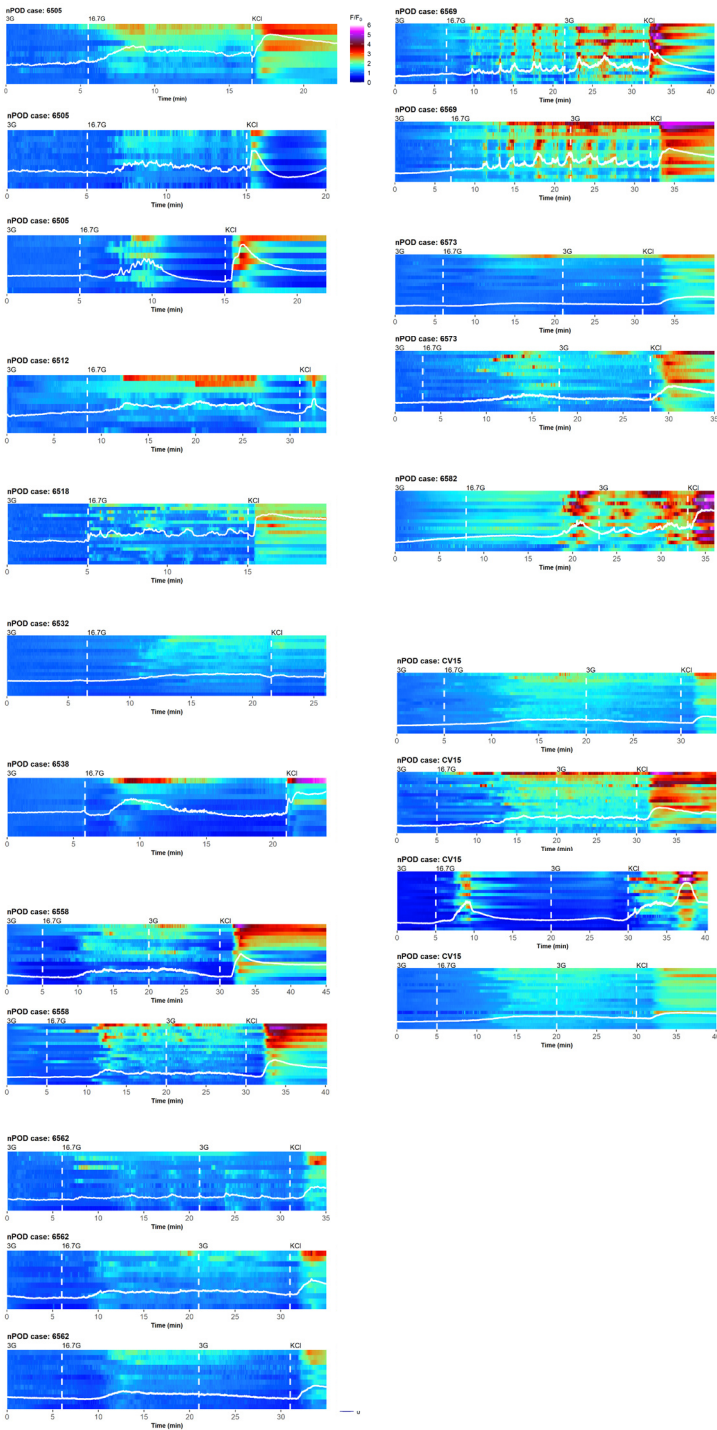

**Supplementary Figure 5:  $Ca^{2+}$  responses of beta cells within Aab+ slices.** Heatmaps of all Aab+  $Ca^{2+}$  recordings showing the changes in fluorescence of the individual ROIs from Aab+ cases along with the superimposed average traces showing the glucose and KCl responses.

## T1D+

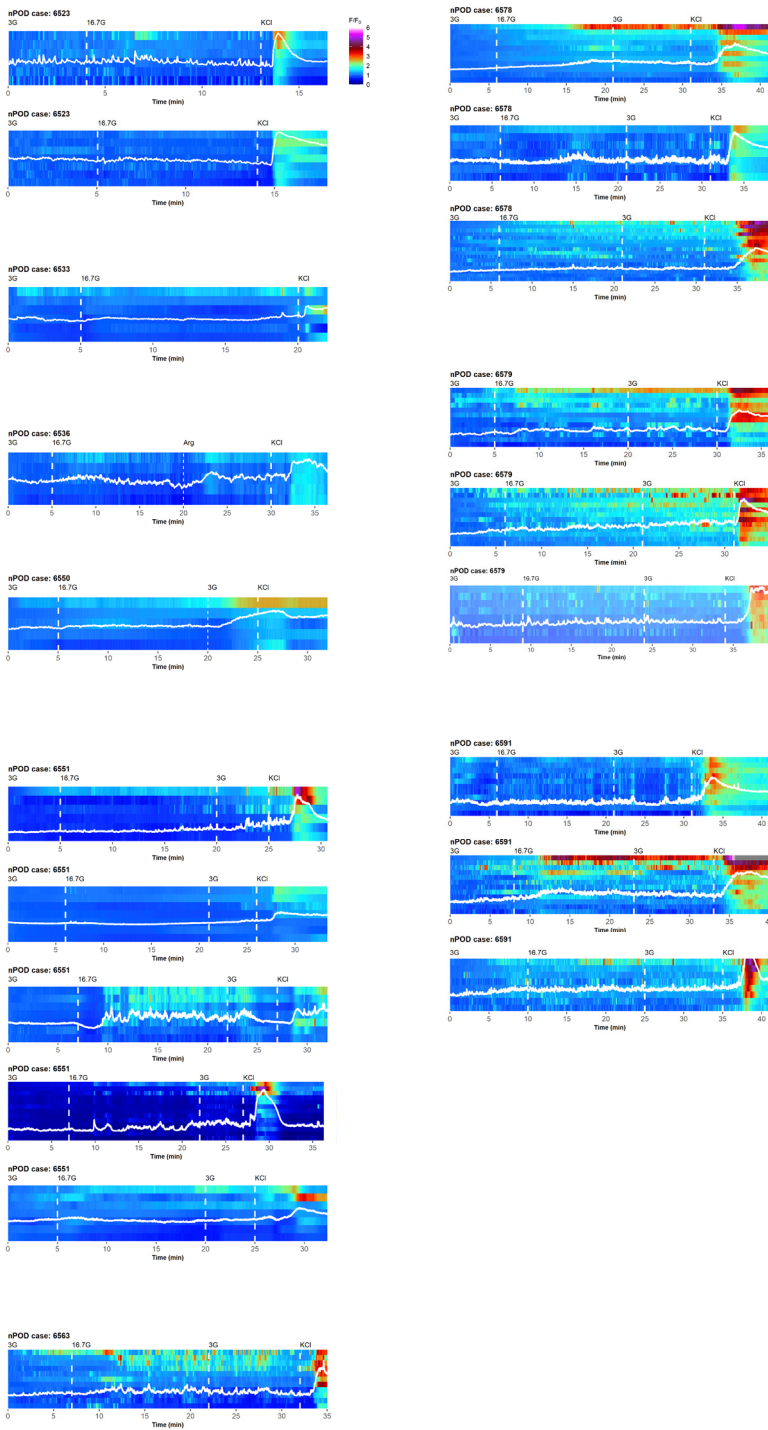

**Supplementary Figure 6:  $\text{Ca}^{2+}$  responses of beta cells within T1D+ slices.** Heatmaps of all T1D+  $\text{Ca}^{2+}$  recordings showing the changes in fluorescence of the individual ROIs from T1D+ cases along with the superimposed average traces showing the lost high glucose responses and maintained KCl responses.

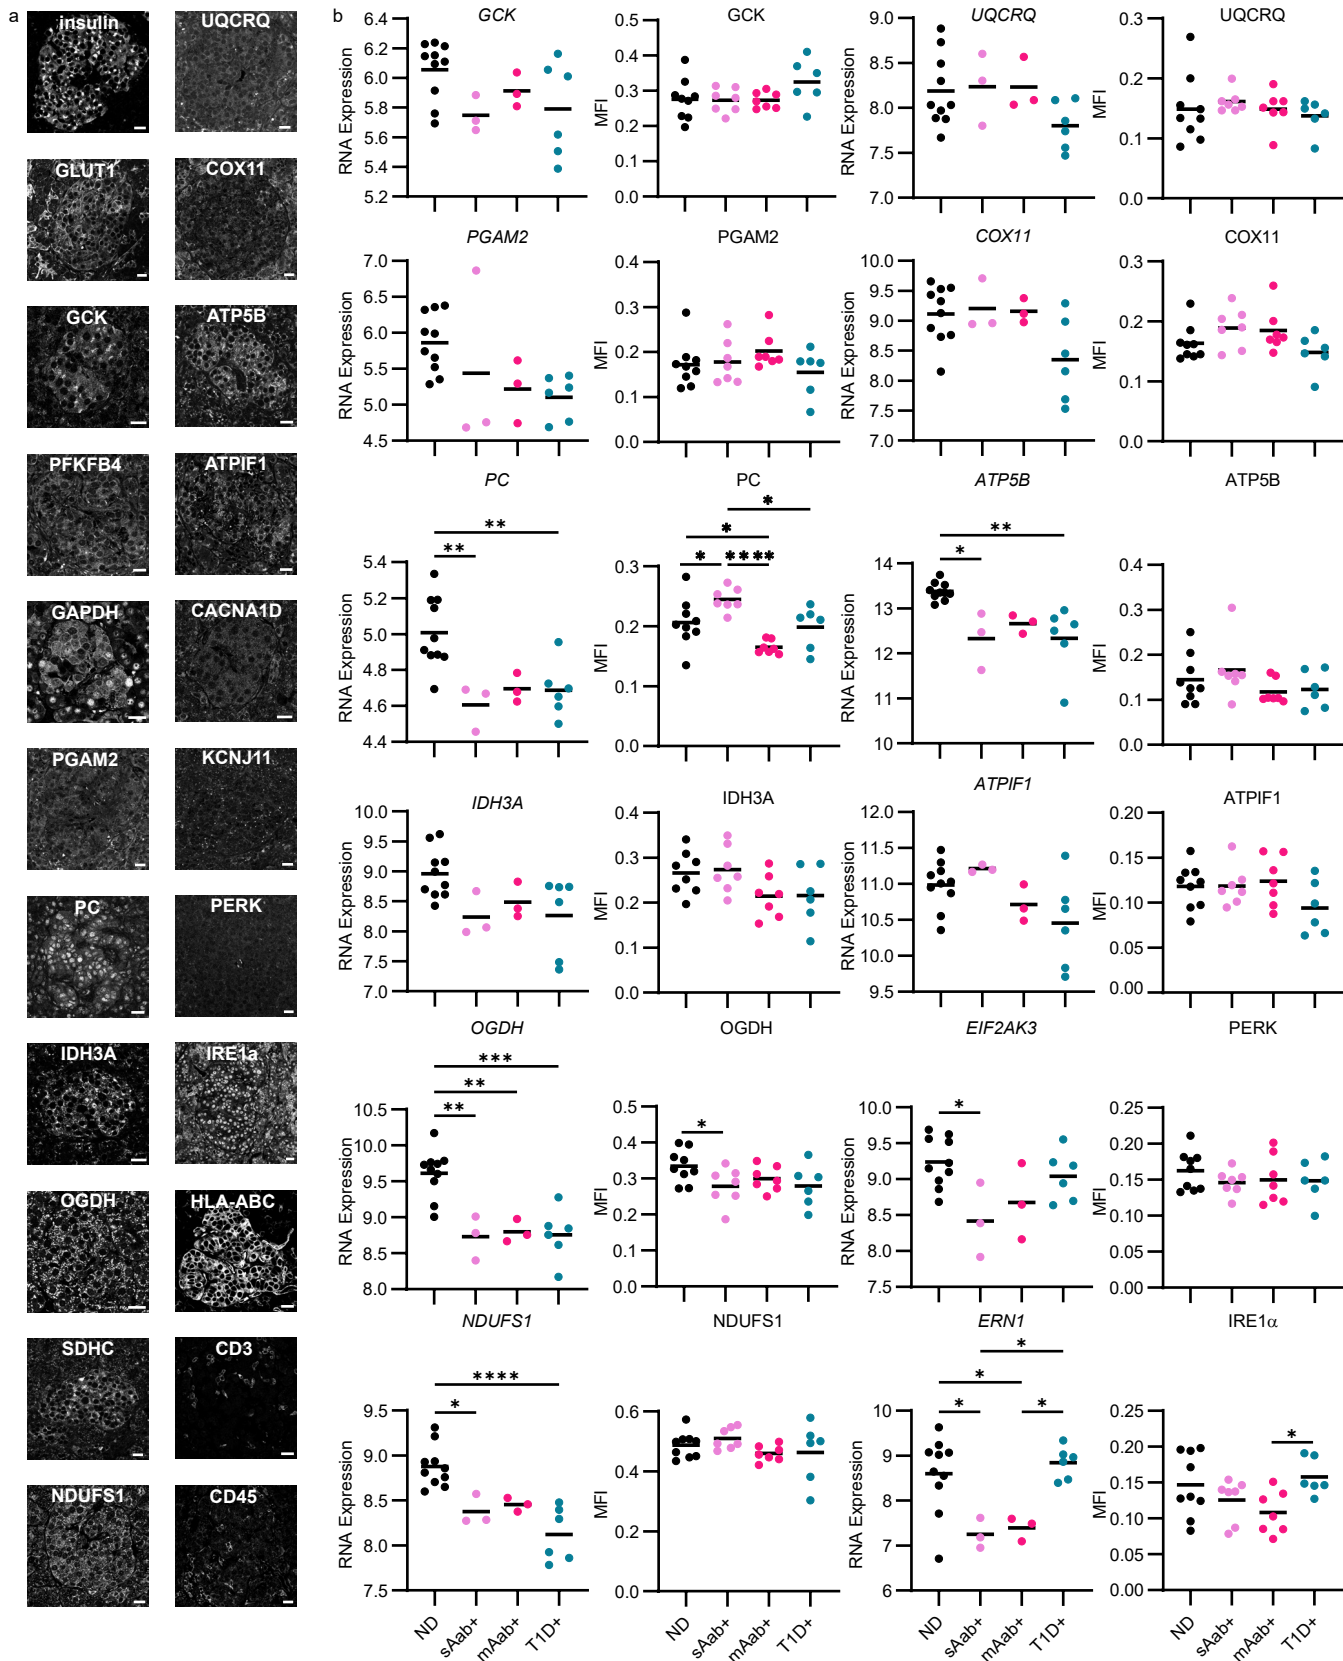

**Supplementary Figure 7: ER stress markers and some glucose metabolism markers do not differ during T1D pathogenesis.** a) Representative images of immunofluorescent staining of FFPE slides of the panel of markers used to assess immune cell infiltration and beta cell glucose metabolism in donors with ND (n=9), sAab+ donors (n=7), mAab+ donors (n=7), T1D+ donors (n=6). Scale bars, 20  $\mu$ m. b) Protein expression levels indicated by mean fluorescence intensity during the different stages of T1D development in donors with ND (n=9), sAab+ donors (n=7), mAab+ donors (n=7), and T1D+ donors (n=6) and RNA expression levels of glucose metabolism markers in laser-capture micro-dissected islets from donors at different stages of T1D development (ND, n=10; sAab+, n=3; mAab+, n=3; T1D+, n=6). MFIs: One-way ANOVA with multiple comparisons, \*P<0.05, \*\*P<0.01, \*\*\*P<0.001, \*\*\*\*P<0.0001. RNA: One-way ANOVA followed by a Tukey post-hoc test, \*P<0.05, \*\*P<0.01, \*\*\*P<0.001, \*\*\*\*P<0.0001.

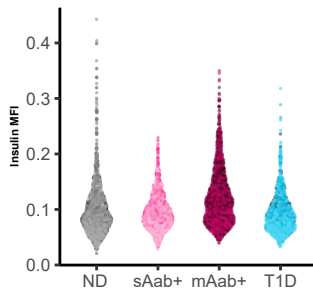

**Supplementary Figure 8: Insulin protein levels within beta cells does not change as T1D progresses.** Protein expression levels of insulin within beta cells indicated by mean fluorescence intensity during the different stages of T1D development in donors with ND (n=9), sAab+ donors (n=7), mAab+ donors (n=7), and T1D+ donors (n=6). Each dot represents an islet. One-way ANOVA with multiple comparisons,

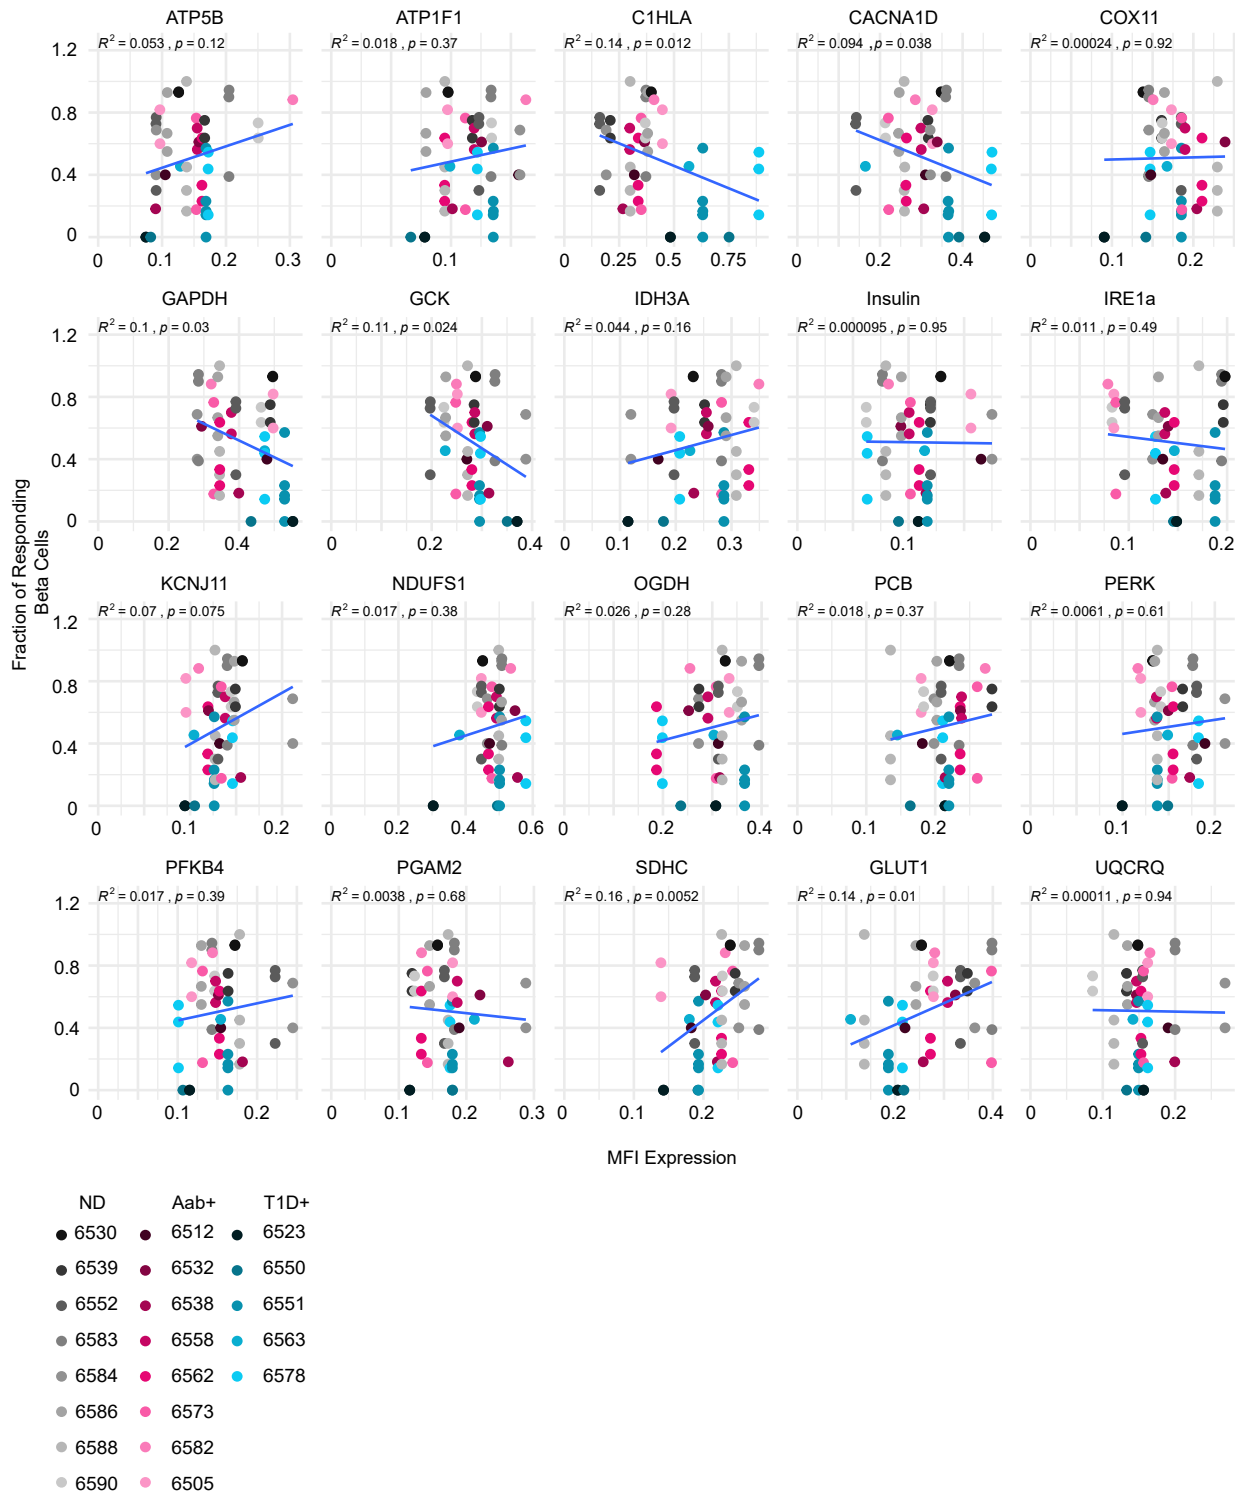

**Supplementary Figure 9: Correlation of beta cell function and glucose metabolism markers.** Graphs showing the relationship between the fraction of responding beta cells and protein expression of markers of glucose metabolism with the linear models indicated in blue.

**Supplementary Table 1: Donor characteristics from nPOD cases. Table summarizes donor information and applied studies.**

| Case | RRID         | Type        | Duration (years) | Autoantibody | Age (years) | Sex | Ethnicity        | HbA1c | C-pep (ng/mL) | HLA-DR  | HLA-DQ   | Data Types                                 |
|------|--------------|-------------|------------------|--------------|-------------|-----|------------------|-------|---------------|---------|----------|--------------------------------------------|
| CV14 | SAMN38117313 | No Diabetes |                  | Negative     | 9.85        | F   | Caucasian        | 5.3   | 4.37          | DR07/15 | DQ02/06  | Ca <sup>2+</sup> recordings, perfusion     |
| 6073 | SAMN15879130 | No Diabetes |                  | Negative     | 19.2        | M   | Caucasian        | 0     | 0.69          | DR13/16 | DQ05/06  | RNA expression                             |
| 6098 | SAMN15879155 | No Diabetes |                  | Negative     | 17.8        | M   | Caucasian        | 4.9   | 1.41          | DR17/08 | DQ02/04  | RNA expression                             |
| 6131 | SAMN15879188 | No Diabetes |                  | Negative     | 24.2        | M   | Caucasian        | 0     | 1.01          | DR17/17 | DQ02/02  | RNA expression                             |
| 6230 | SAMN15879286 | No Diabetes |                  | Negative     | 16          | M   | Caucasian        | 5.3   | 5.22          | DR04/11 | DQ07/08  | RNA expression                             |
| 6235 | SAMN15879291 | No Diabetes |                  | Negative     | 30          | M   | Caucasian        | 0     | 8.1           | DR04/17 | DQ02/08  | RNA expression                             |
| 6293 | SAMN15879347 | No Diabetes |                  | Negative     | 9           | F   | Caucasian        | 0     | 2.22          | DR01/11 | DQ05/07  | RNA expression                             |
| 6316 | SAMN15879370 | No Diabetes |                  | Negative     | 6           | M   | Caucasian        | 0     | 4.58          | DR04/13 | DQ08/09  | RNA expression                             |
| 6336 | SAMN15879390 | No Diabetes |                  | Negative     | 14.3        | F   | Caucasian        | 5.2   | 7.87          | DR07/13 | DQ02/06  | RNA expression                             |
| 6339 | SAMN15879393 | No Diabetes |                  | Negative     | 23.3        | M   | Caucasian        | 5.3   | 10.56         | DR03/10 | DQ02/05  | RNA expression                             |
| 6401 | SAMN15879454 | No Diabetes |                  | Negative     | 25.07       | F   | Hispanic/ Latino | 5.8   | 12.81         | DR07/13 | DQ02/06  | RNA expression                             |
| 6516 | SAMN18053200 | No Diabetes |                  | Negative     | 20.75       | M   | Caucasian        | 5.5   | 8.91          | DR01/07 | DQ02/05  | Ca <sup>2+</sup> recordings, perfusion     |
| 6530 | SAMN18053212 | No Diabetes |                  | Negative     | 14.52       | F   | African American | 6     | 7.41          | DR04/17 | DQ02/08  | Ca <sup>2+</sup> recordings, IF, perfusion |
| 6535 | SAMN18242779 | No Diabetes |                  | Negative     | 31.07       | F   | Caucasian        |       | 6.59          | DR11/13 | DQ06/07  | Ca <sup>2+</sup> recordings                |
| 6539 | SAMN25652250 | No Diabetes |                  | Negative     | 24.6        | M   | Hispanic         | 5.7   | 39.23         | DR04/13 | DQ06/08  | Ca <sup>2+</sup> recordings, IF            |
| 6540 | SAMN25652251 | No Diabetes |                  | Negative     | 6.86        | F   | Hispanic         | 5.8   | 2.03          | DR04/11 | DQ07/04  | Ca <sup>2+</sup> recordings, perfusion     |
| 6552 | SAMN30386842 | No Diabetes |                  | Negative     | 33.87       | F   | Caucasian        | 5.6   | 1.8           | DR17/04 | DQ02/08  | Ca <sup>2+</sup> recordings, IF, perfusion |
| 6559 | SAMN30386848 | No Diabetes |                  | Negative     | 23.46       | F   | Asian            | 5.3   | 7.02          | DR11/12 | DQ07/--  | IF                                         |
| 6583 | SAMN38117303 | No Diabetes |                  | Negative     | 30          | M   | Caucasian        | 5     | 10.55         | DR11/13 | DQ07/06  | Ca <sup>2+</sup> recordings, IF, perfusion |
| 6584 | SAMN38117304 | No Diabetes |                  | Negative     | 22          | M   | Caucasian        | 5.3   | 6.02          | DR04/11 | DQ07/08  | Ca <sup>2+</sup> recordings, IF, perfusion |
| 6586 | SAMN38117306 | No Diabetes |                  | Negative     | 13          | M   | Caucasian        | 5.1   | 6.83          | DR04/07 | DQ02/08  | Ca <sup>2+</sup> recordings, IF, perfusion |
| 6588 | SAMN40555580 | No Diabetes |                  | Negative     | 29          | F   | Caucasian        | 5.1   | 7.3           | DR04/11 | DQ07/07  | Ca <sup>2+</sup> recordings, IF, perfusion |
| 6590 | SAMN38117309 | No Diabetes |                  | Negative     | 16          | F   | African American | 5.3   | 49.65         | DR08/13 | DQ06/07  | Ca <sup>2+</sup> recordings, IF, perfusion |
| 6597 | SAMN40555584 | No Diabetes |                  | Negative     | 6           | F   | Hispanic/Latino  | 5.7   | 5.02          | DR04/04 | DQB08/08 | Ca <sup>2+</sup> recordings                |
| 6598 | SAMN40555585 | No Diabetes |                  | Negative     | 17          | M   | Hispanic/Latino  | 5.4   | 1.36          | DR04/14 | DQB07/08 | Ca <sup>2+</sup> recordings                |
| CV15 | SAMN40555609 | Aab+        |                  | GADA+        | 18.93       | M   | Caucasian        | 5.2   | 5.03          | DR07/15 | DQ06/09  | Ca <sup>2+</sup> recordings, perfusion     |
| 6080 | SAMN15879137 | Aab+        |                  | GADA+, mIAA+ | 69.2        | F   | Caucasian        | 0     | 1.84          | DR01/04 | DQ03/05  | RNA expression                             |

| Case | RRID         | Type | Duration (years) | Autoantibody                | Age (years) | Sex | Ethnicity        | HbA1c | C-pep (ng/mL) | HLA-DR     | HLA-DQ    | Data Types                                  |
|------|--------------|------|------------------|-----------------------------|-------------|-----|------------------|-------|---------------|------------|-----------|---------------------------------------------|
| 6147 | SAMN15879203 | Aab+ |                  | GADA+                       | 23.8        | F   | Caucasian        | 5.2   | 3.19          | DR04/08    | DQ04/07   | RNA expression                              |
| 6158 | SAMN15879214 | Aab+ |                  | GADA+, mIAA+                | 40.3        | M   | Caucasian        | 5.6   | 0.51          | DR04/13    | DQ06/07   | RNA expression                              |
| 6167 | SAMN15879223 | Aab+ |                  | IA2A+, ZnT8A+               | 37          | M   | Caucasian        | 0     | 5.43          | DR04/02    | DQ08/06   | RNA expression                              |
| 6181 | SAMN15879237 | Aab+ |                  | GADA+                       | 31.9        | M   | Caucasian        | 0     | 0.06          | DR01/04    | DQ08/05   | RNA expression                              |
| 6314 | SAMN15879368 | Aab+ |                  | GADA+                       | 21          | M   | Caucasian        | 0     | 1.49          | DR103/04   | DQ03/05   | RNA expression                              |
| 6424 | SAMN15879477 | Aab+ |                  | GADA+, mIAA+                | 17.65       | M   | Caucasian        | 5.8   | 6.97          | DR17/04    | DQ02/08   | IF                                          |
| 6429 | SAMN15879482 | Aab+ |                  | GADA+, mIAA+                | 22.1        | M   | African American | 5.5   | 2.25          | DR103/17   | DQ02/05   | IF                                          |
| 6450 | SAMN15879503 | Aab+ |                  | GADA+, ZnT8A+               | 22          | F   | Caucasian        | 5.7   | 5.47          | DR17/--    | DQ02/--   | IF                                          |
| 6505 | SAMN15879558 | Aab+ |                  | GADA+, mIAA+                | 20.59       | F   | Hispanic         | 5.1   | 20.8          | DR04/07    | DQ02/08   | Ca <sup>2+</sup> recordings, IF, perfusion, |
| 6512 | SAMN15879564 | Aab+ |                  | IA2A+, mIAA+, ZnT8A+        | 30.59       | F   | Caucasian        | 5.2   | 3.2           | DR04/07    | DQ02/07   | Ca <sup>2+</sup> recordings, IF, perfusion  |
| 6518 | SAMN25652247 | Aab+ |                  | GADA+                       | 21.86       | M   | Caucasian        | 6     | 10.93         | DR01/01:03 | DQ05/05   | Ca <sup>2+</sup> recordings, perfusion      |
| 6521 | SAMN18053204 | Aab+ |                  | GADA+, IA2A+, ZnT8A+        | 19.77       | M   | Hispanic/ Latino | 5.8   | 7.44          | DR04/17    | DQ02/08   | IF                                          |
| 6532 | SAMN18053214 | Aab+ |                  | GADA+                       | 20.04       | M   | Hispanic         | 5.9   | 22.12         | DR07/11    | DQ02/07   | Ca <sup>2+</sup> recordings, IF, perfusion  |
| 6538 | SAMN25652249 | Aab+ |                  | GADA+                       | 19.14       | M   | Caucasian        | 5.8   | 11.33         | DR17/08    | DQ02/04   | Ca <sup>2+</sup> recordings, IF, perfusion  |
| 6549 | SAMN25652260 | Aab+ |                  | GADA+, mIAA+                | 4.22        | M   | Caucasian        | 6.2   | 1.17          | DR04/07    | DQ08/09   | IF                                          |
| 6553 | SAMN30386843 | Aab+ |                  | mIAA+                       | 12.34       | F   | Hispanic/ Latino | 8.4   | 4.62          | DR17/04    | DQ02/08   | IF                                          |
| 6558 | SAMN30386847 | Aab+ |                  | GADA+                       | 21.69       | F   | African American | 4.4   | 8.03          | DR17/07    | DQ02/--   | Ca <sup>2+</sup> recordings, IF             |
| 6562 | SAMN30386850 | Aab+ |                  | GADA+                       | 29.77       | F   | Caucasian        | 5.6   | 13.19         | DR04/15    | DQ06/08   | Ca <sup>2+</sup> recordings, IF             |
| 6569 | SAMN38117299 | Aab+ |                  | GADA+                       | 20          | F   | Hispanic         | 6     | 2.44          | DR04/15    | DQ08/06   | Ca <sup>2+</sup> recordings, perfusion      |
| 6573 | SAMN33284291 | Aab+ |                  | GADA+                       | 24.48       | F   | Caucasian        | 5.1   | 1.85          | DR01/17    | DQ02/05   | Ca <sup>2+</sup> recordings, IF, perfusion  |
| 6582 | SAMN38117302 | Aab+ |                  | GADA+                       | 22.38       | M   | Caucasian        | 5.6   | 2.67          | DR17/04    | DQ02/08   | Ca <sup>2+</sup> recordings, IF, perfusion  |
| 6268 | SAMN15879322 | T1D+ | 3                | mIAA+                       | 12          | F   | Caucasian        | 9.8   | 0.05          | DR13/17    | DQ02/06   | RNA expression                              |
| 6306 | SAMN15879360 | T1D+ | 5                | mIAA+                       | 19          | M   | Caucasian        | 10.1  | <0.02         | DR04/17    | DQ02/08   | RNA expression                              |
| 6342 | SAMN15879396 | T1D+ | 2                | IA2A+, mIAA+                | 14          | F   | Caucasian        | 9.2   | 0.26          | DR01/04    | DQ08/05   | RNA expression                              |
| 6362 | SAMN15879415 | T1D+ | 0                | GADA+                       | 24.9        | M   | Caucasian        | 10    | 0.38          | DR103/17   | DQ02/05   | RNA expression                              |
| 6371 | SAMN15879424 | T1D+ | 2                | GADA+, IA2A+, mIAA+, ZnT8A+ | 12.5        | F   | Caucasian        | 9.5   | 0.11          | DR13/17    | DQ02/06   | RNA expression                              |
| 6396 | SAMN15879449 | T1D+ | 2                | Negative                    | 17.1        | F   | Caucasian        | 13.4  | 0.06          | DR07/17    | DQ02/null | RNA expression                              |
| 6523 | SAMN18053206 | T1D  | 3                | GADA+, mIAA+                | 12.17       | F   | African American | 11.1  | 0.04          | DR17/07    | DQ02/02   | Ca <sup>2+</sup> recordings, IF             |



| Case | RRID         | Type | Duration (years) | Autoantibody                | Age (years) | Sex | Ethnicity        | HbA1c | C-pep (ng/mL) | HLA-DR  | HLA-DQ   | Data Types                                 |
|------|--------------|------|------------------|-----------------------------|-------------|-----|------------------|-------|---------------|---------|----------|--------------------------------------------|
| 6526 | SAMN18053209 | T1D  | 1                | GADA+, mIAA+                | 29.74       | M   | Hispanic/ Latino | 6.6   | 0.07          | DR04/13 | DQ08/06  | IF                                         |
| 6533 | SAMN18242777 | T1D  | 0                | IA2A+, mIAA+, ZnT8A+        | 3.75        | F   | Caucasian        | 11.4  | 0.17          | DR04/17 | DQ02/08  | Ca <sup>2+</sup> recordings, perfusion     |
| 6536 | SAMN18242780 | T1D  | 4                | GADA+                       | 20.16       | F   | Caucasian        | 12.7  | 0.04          | DR04/17 | DQ02/08  | Ca <sup>2+</sup> recordings, perfusion     |
| 6550 | SAMN25652261 | T1D  | 0                | GADA+, ZnT8A+               | 25.06       | M   | Caucasian        | 14    | 0.02          | DR17/-- | DQ02/07  | Ca <sup>2+</sup> recordings, IF, perfusion |
| 6551 | SAMN25652262 | T1D  | 0.58             | GADA+, IA2A+, mIAA+, ZnT8A+ | 20.7        | M   | Caucasian        | 6.4   | 0.11          | DR04/07 | DQ02/07  | Ca <sup>2+</sup> recordings, IF, perfusion |
| 6563 | SAMN30386851 | T1D  | 0                | IA2A+                       | 14.56       | F   | Caucasian        | 9.6   | 1.04          | DR07/08 | DQ02/04  | Ca <sup>2+</sup> recordings, IF, perfusion |
| 6578 | SAMN33284295 | T1D  | 0                | IA2A+, ZnT8A+               | 11.95       | F   | Caucasian        | 13.6  | 0.35          | DR04/11 | DQ07/08  | Ca <sup>2+</sup> recordings, IF, perfusion |
| 6579 | SAMN33284296 | T1D  | 1                | GADA+, mIAA+                | 13          | F   | Caucasian        | 15    | 0.31          | DR17/13 | DQB02/06 | Ca <sup>2+</sup> recordings, perfusion     |
| 6591 | SAMN38117310 | T1D  | 0                | IA2A+, ZnT8A+               | 3           | M   | Caucasian        | 12.8  | 0.03          | DR04/13 | DQ08/06  | Ca <sup>2+</sup> recordings, perfusion     |

**Supplementary Table 2: Ca<sup>2+</sup> imaging summary. Ca<sup>2+</sup> imaging characteristics and protocols for all recordings.**

| Case | Cell Selection | Slice | Ca <sup>2+</sup> Indicator | Protocol                                                    | Frame Rate (s) |
|------|----------------|-------|----------------------------|-------------------------------------------------------------|----------------|
| 6505 | Reflectance    | 2     | Fluo4                      | 0-5 min LG, 5-15 min HG, 15 min-end KCl                     | 2.873          |
| 6505 | Reflectance    | 5     | Fluo4                      | 0-5 min LG, 5-15 min HG, 15 min-end KCl                     | 1.99913        |
| 6505 | Reflectance    | 6     | Fluo4                      | 0-5 min LG, 5-15 min HG, 16 min-end KCl                     | 1.99886        |
| 6512 | Reflectance    | 2     | Fluo4                      | 0-7 min LG, 7-22 min 30s HG, 22 min 30s -end KCl            | 1.99986        |
| 6516 | Reflectance    | 1     | Fluo4                      | 0-5 min LG, 5-20 min HG, 20 min-end KCl                     | 2.31722        |
| 6516 | Reflectance    | 4     | Fluo4                      | 0-5 min LG, 5-20 min HG, 20 min-end KCl                     | 2.31152        |
| 6516 | Reflectance    | 6     | Fluo4                      | 0-5 min LG, 5-30 min HG, 30 min-end KCl                     | 2.31424        |
| 6516 | Reflectance    | 7     | Fluo4                      | 0-5 min LG, 5-20 min HG, 20 min-end KCl                     | 2.31447        |
| 6516 | Reflectance    | 8     | Fluo4                      | 0-5 min LG, 5-40 min HG, 40 min-end KCl                     | 2.31152        |
| 6518 | Reflectance    | 4     | Fluo4                      | 0-5 min LG, 5-15 min HG, 15 min-end KCl                     | 3.52091        |
| 6523 | Reflectance    | 3     | Fluo4                      | 0-3 min LG, 3-18 min HG, 18 min-end KCl                     | 2.72597        |
| 6523 | Reflectance    | 4     | Fluo4                      | 0-3 min LG, 3-18 min HG, 18 min-end KCl                     | 2.72598        |
| 6530 | ENTPD3         | 1     | Fluo4                      | 0-5 min LG, 5-20 min HG, 20 min-end KCl                     | 1.99799        |
| 6530 | ENTPD3         | 3     | Fluo4                      | 0-5 min LG, 5-20 min HG, 20 min-end KCl                     | 1.99883        |
| 6530 | ENTPD3         | 4     | Fluo4                      | 0-5 min LG, 5-20 min HG, 20 min-end KCl                     | 1.99834        |
| 6532 | ENTPD3         | 6     | Fluo4                      | 0-5 min LG, 5-20 min HG, 20 min-end KCl                     | 1.99933        |
| 6533 | ENTPD3         | 10    | Fluo4                      | 0-5 min LG, 5-20 min HG, 20 min-end KCl                     | 2.55227        |
| 6535 | ENTPD3         | 8     | Fluo4                      | 0-5 min LG, 5-20 min HG, 20-30 min arginine, 30 min-end KCl | 2.31722        |
| 6536 | ENTPD3         | 4     | Fluo4                      | 0-5 min LG, 5-20 min HG, 20-30 min arginine, 30 min-end KCl | 2.31721        |
| 6538 | ENTPD3         | 4     | Fluo4                      | 0-5 min 50s LG, 5 min 50s- 21 min HG, 21 min-end KCl        | 2.31696        |
| 6539 | ENTPD3         | 1     | Fluo4                      | 0-5 min LG, 5-20 min HG, 20 min-end KCl                     | 2.31335        |
| 6539 | ENTPD3         | 2     | Fluo4                      | 0-5 min LG, 5-20 min HG, 20 min-end KCl                     | 2.31407        |
| 6540 | ENTPD3         | 3     | Fluo4                      | 0-5 min LG, 5-20 min HG, 20 min-end KCl                     | 2.31721        |
| 6550 | ENTPD3         | 2     | Fluo4                      | 0-5 min LG, 5-20 min HG, 20-25 min LG, 25 min-end KCl       | 2.31721        |
| 6551 | ENTPD3         | 1     | Calbryte520                | 0-5 min LG, 5-20 min HG, 20-25 min LG, 25 min-end KCl       | 0.37442        |
| 6551 | ENTPD3         | 2     | Calbryte520                | 0-5 min LG, 5-20 min HG, 20-25 min LG, 25 min-end KCl       | 0.37585        |
| 6551 | ENTPD3         | 4     | Calbryte520                | 0-5 min LG, 5-20 min HG, 20-25 min LG, 25 min-end KCl       | 0.37442        |
| 6551 | ENTPD3         | 5     | Calbryte520                | 0-5 min LG, 5-20 min HG, 20-25 min LG, 25 min-end KCl       | 0.37728        |
| 6551 | ENTPD3         | 6     | Calbryte520                | 0-5 min LG, 5-20 min HG, 20-25 min LG, 25 min-end KCl       | 0.37585        |
| 6552 | ENTPD3         | 1     | Calbryte520                | 0-5 min LG, 5-20 min HG, 20-27 min LG, 27 min-end KCl       | 0.37585        |
| 6552 | ENTPD3         | 4     | Calbryte520                | 0-5 min LG, 5-20 min HG, 20-25 min LG, 25 min-end KCl       | 0.37727        |
| 6552 | ENTPD3         | 5     | Calbryte520                | 0-5 min LG, 5-20 min HG, 20-25 min LG, 25 min-end KCl       | 0.37585        |
| 6558 | ENTPD3         | 3     | Calbryte520                | 0-5 min LG, 5-20 min HG, 20-30 min LG, 30 min-end KCl       | 0.37727        |
| 6558 | ENTPD3         | 4     | Calbryte520                | 0-5 min LG, 5-20 min HG, 20-30 min LG, 30 min-end KCl       | 0.37585        |
| 6562 | RL             | 2     | Calbryte520                | 0-5 min LG, 5-20 min HG, 20-30 min LG, 30 min-end KCl I     | 4.38736        |
| 6562 | ENTPD3         | 3     | Calbryte520                | 0-5 min LG, 5-20 min HG, 20-30 min LG, 30 min-end KCl       | 0.37443        |
| 6562 | ENTPD3         | 4     | Calbryte520                | 0-5 min LG, 5-20 min HG, 20-30 min LG, 30 min-end KCl       | 0.37443        |
| 6563 | ENTPD3         | 2     | Calbryte520                | 0-5 min LG, 5-20 min HG, 20-30 min LG, 30 min-end KCl       | 0.37585        |
| CV14 | ENTPD3         | 6     | Calbryte520                | 0-6 min LG, 6-21 min HG, 21-31 min LG, 31 min-end KCl       | 0.37585        |
| CV14 | ENTPD3         | 7     | Calbryte520                | 0-5 min LG, 5-20 min HG, 20-30 min LG, 30 min-end KCl       | 0.37727        |

| Case | Cell Selection | Slice | Ca <sup>2+</sup> Indicator | Protocol                                                                              | Frame Rate (s) |
|------|----------------|-------|----------------------------|---------------------------------------------------------------------------------------|----------------|
| 6569 | ENTPD3         | 5     | Calbryte520                | 0-5 min LG, 5-20 min HG, 20-30 min LG, 30 min-end KCl                                 | 0.37585        |
| 6569 | ENTPD3         | 6     | Calbryte520                | 0-5 min 30s LG, 5 min 30s-20 min 30s HG, 20 min 30s-30 min 30s LG, 30 min 30s-end KCl | 0.37585        |
| CV15 | ENTPD3         | 1     | Calbryte520                | 0-5 min LG, 5-20 min HG, 20-30 min LG, 30 min-end KCl                                 | 0.37585        |
| CV15 | ENTPD3         | 2     | Calbryte520                | 0-5 min LG, 5-20 min HG, 20-30 min LG, 30 min-end KCl                                 | 0.37585        |
| CV15 | ENTPD3         | 5     | Calbryte520                | 0-5 min LG, 5-20 min HG, 20-30 min LG, 30 min-end KCl                                 | 0.37585        |
| CV15 | ENTPD3         | 6     | Calbryte520                | 0-5 min LG, 5-20 min HG, 20-30 min LG, 30 min-end KCl                                 | 0.37585        |
| 6573 | ENTPD3         | 3     | Calbryte520                | 0-5 min LG, 5-20 min HG, 20-30 min LG, 30 min-end KCl                                 | 0.37585        |
| 6573 | ENTPD3         | 4     | Calbryte520                | 0-5 min LG, 5-20 min HG, 20-30 min LG, 30 min-end KCl                                 | 0.37585        |
| 6578 | ENTPD3         | 2     | Calbryte520                | 0-5 min LG, 5-20 min HG, 20-30 min LG, 30 min-end KCl                                 | 0.37585        |
| 6578 | ENTPD3         | 3     | Calbryte520                | 0-5 min LG, 5-20 min HG, 20-30 min LG, 30 min-end KCl                                 | 0.37585        |
| 6578 | ENTPD3         | 4     | Calbryte520                | 0-5 min LG, 5-20 min HG, 20-30 min LG, 30 min-end KCl                                 | 0.37585        |
| 6579 | ENTPD3         | 1     | Calbryte520                | 0-5 min LG, 5-20 min HG, 20-30 min LG, 30 min-end KCl                                 | 0.37727        |
| 6579 | ENTPD3         | 4     | Calbryte520                | 0-5 min LG, 5-20 min HG, 20-30 min LG, 30 min-end KCl                                 | 0.37727        |
| 6579 | ENTPD3         | 7     | Calbryte520                | 0-5 min LG, 5-20 min HG, 20-30 min LG, 30 min-end KCl                                 | 0.39293        |
| 6582 | ENTPD3         | 1     | Calbryte520                | 0-5 min LG, 5-20 min HG, 20-30 min LG, 30 min-end KCl                                 | 0.37585        |
| 6583 | ENTPD3         | 1     | Calbryte520                | 0-5 min LG, 5-20 min HG, 20-30 min LG, 30 min-end KCl                                 | 0.37727        |
| 6583 | ENTPD3         | 3     | Calbryte520                | 0-5 min LG, 5-20 min HG, 20-30 min LG, 30 min-end KCl                                 | 0.37727        |
| 6583 | ENTPD3         | 4     | Calbryte520                | 0-5 min LG, 5-20 min HG, 20-30 min LG, 30 min-end KCl                                 | 0.37585        |
| 6584 | ENTPD3         | 7     | Calbryte520                | 0-5 min LG, 5-20 min HG, 20-30 min LG, 30 min-end KCl                                 | 0.37727        |
| 6584 | ENTPD3         | 9     | Calbryte520                | 0-5 min LG, 5-20 min HG, 20-30 min LG, 30 min-end KCl                                 | 0.37727        |
| 6586 | ENTPD3         | 1     | Calbryte520                | 0-5 min LG, 5-20 min HG, 20-30 min LG, 30 min-end KCl                                 | 0.37442        |
| 6586 | ENTPD3         | 2     | Calbryte520                | 0-5 min LG, 5-20 min HG, 20-30 min LG, 30 min-end KCl                                 | 0.37728        |
| 6586 | ENTPD3         | 3     | Calbryte520                | 0-6 min LG, 6-21 min HG, 21-31 min LG, 31 min-end KCl                                 | 0.37728        |
| 6588 | ENTPD3         | 1     | Calbryte520                | 0-5 min LG, 5-20 min HG, 20-30 min LG, 30 min-end KCl                                 | 0.37727        |
| 6588 | ENTPD3         | 2     | Calbryte520                | 0-5 min LG, 5-20 min HG, 20-30 min LG, 30 min-end KCl                                 | 0.37727        |
| 6588 | ENTPD3         | 3     | Calbryte520                | 0-5 min LG, 5-20 min HG, 20 min-30 min 40s LG, 30 min 40s-end KCl                     | 0.37727        |
| 6588 | ENTPD3         | 4     | Calbryte520                | 0-5 min LG, 5-20 min 30s HG, 20 min 30s-30min 30s LG, 30 min 30s-end KCl              | 0.37727        |
| 6590 | ENTPD3         | 2     | Calbryte520                | 0-5 min LG, 5-20 min HG, 20-30 min LG, 30 min-end KCl                                 | 0.37585        |
| 6590 | ENTPD3         | 3     | Calbryte520                | 0-5 min LG, 5-20 min HG, 20-30 min LG, 30 min-end KCl                                 | 0.37585        |
| 6590 | ENTPD3         | 5     | Calbryte520                | 0-5 min LG, 5-20 min HG, 20-30 min LG, 30 min-end KCl                                 | 0.37727        |
| 6591 | ENTPD3         | 6     | Calbryte520                | 0-5 min LG, 5-20 min HG, 20-30 min LG, 30 min-end KCl                                 | 0.37727        |
| 6591 | ENTPD3         | 9     | Calbryte520                | 0-5 min LG, 5-20 min HG, 20-30 min LG, 30 min-end KCl                                 | 0.37585        |
| 6591 | ENTPD3         | 10    | Calbryte520                | 0-5 min LG, 5-20 min HG, 20-30 min LG, 30 min-end KCl                                 | 0.37585        |
| 6597 | ENTPD3         | 1     | Calbryte520                | 0-5 min LG, 5-20 min HG, 20-30 min LG, 30 min-end KCl                                 | 0.37727        |
| 6597 | ENTPD3         | 3     | Calbryte520                | 0-5 min LG, 5-20 min HG, 20-30 min LG, 30 min-end KCl                                 | 0.37728        |
| 6598 | ENTPD3         | 1     | Calbryte520                | 0-5 min LG, 5-20 min HG, 20-30 min LG, 30 min-end KCl                                 | 0.37727        |
| 6598 | ENTPD3         | 2     | Calbryte520                | 0-5 min LG, 5-20 min HG, 20-30 min LG, 30 min-end KCl                                 | 0.37585        |
| 6598 | ENTPD3         | 3     | Calbryte520                | 0-5 min LG, 5-20 min HG, 20-30 min LG, 30 min-end KCl                                 | 0.37585        |
| 6598 | ENTPD3         | 4     | Calbryte520                | 0-5 min LG, 5-20 min HG, 20-30 min LG, 30 min-end KCl                                 | 0.37727        |

**Supplementary Table 3: FFPE staining panels. Staining panels and protocols used for the immunofluorescent staining of FFPE pancreas tissue sections.**

| Panel | Primary Antibody | Dilution | Incubation Time | Catalog Information                              | Secondary Antibody                                                             | Dilution | Incubation Time | Catalog Information           |
|-------|------------------|----------|-----------------|--------------------------------------------------|--------------------------------------------------------------------------------|----------|-----------------|-------------------------------|
| 1     | ATPIF1           | 1:500    | Overnight       | Invitrogen MA5-31642 Lot WG3320449 Clone 1F3B8   | Goat anti-Mouse IgG2b Heavy Chain Secondary Antibody [FITC]                    | 1:200    | 10 minutes      | Novus NB7520 Lot F15          |
| 1     | ATP5B            | 1:100    | Overnight       | Invitrogen A21351 Lot 2747427 Clone 3D5          | Goat anti-Mouse IgG1 Heavy Chain Secondary Antibody [DyLight 550]              | 1:200    | 10 minutes      | Novus NB7508R Lot D109323     |
| 1-10  | CD3              | 1:50     | Overnight       | Dako A0452 Lot 41495387                          | Goat anti-Rabbit IgG (H+L) Cross-Adsorbed Secondary Antibody, Alexa Fluor™ 405 | 1:100    | 10 minutes      | Invitrogen A31556 Lot 2465047 |
| 1-10  | Insulin (AF647)  | 1:200    | 1 hour          | BD Pharmingen 565689 Lot 2168160 Clone T56-706   | NA                                                                             | NA       | NA              | NA                            |
| 2     | KCNJ11           | 1:100    | Overnight       | Invitrogen PA5-99440 Lot XC3547445               | IgG (H+L) Cross-Adsorbed Goat anti-Rabbit, Alexa Fluor™ 488                    | 1:200    | 10 minutes      | Invitrogen A11008 Lot 2743033 |
| 2     | SDHC             | 1:100    | Overnight       | Santa Cruz sc-515102 Lot A3020 Clone C-2         | Goat anti-Mouse IgG1 Heavy Chain Secondary Antibody [DyLight 550]              | 1:200    | 10 minutes      | Novus NB7508R Lot D109323     |
| 3     | PCB              | 1:100    | Overnight       | Santa Cruz 271493 Lot E1923 Clone H-2            | Goat anti-Mouse IgG1 Heavy Chain Secondary Antibody [DyLight 550]              | 1:200    | 10 minutes      | Novus NB7508R Lot D109323     |
| 3     | SLC2A1           | 1:100    | Overnight       | Invitrogen MA5-31960 Lot XC3541241A Clone SA0377 | IgG (H+L) Cross-Adsorbed Goat anti-Rabbit, Alexa Fluor™ 488                    | 1:200    | 10 minutes      | Invitrogen A11008 Lot 2743033 |
| 4     | GCK              | 1:50     | 72 hours        | Santa Cruz sc-17819 Lot K0821 clone G-6          | Goat anti-Mouse IgG1 Heavy Chain Secondary Antibody [DyLight 550]              | 1:200    | 10 minutes      | Novus NB7508R Lot D109323     |
| 4     | CACNA1D          | 1:100    | Overnight       | Proteintech 22276-1-AP Lot 00040685              | IgG (H+L) Cross-Adsorbed Goat anti-Rabbit, Alexa Fluor™ 488                    | 1:200    | 10 minutes      | Invitrogen A11008 Lot 2743033 |
| 5     | PERK             | 1:100    | Overnight       | LS Bio C353177 Lot 229684                        | Goat anti-Rabbit IgG (H+L) Cross-Adsorbed Secondary Antibody, Alexa Fluor™ 555 | 1:200    | 10 minutes      | Invitrogen A21428 Lot 2527964 |
| 5     | NDUFS1           | 1:200    | Overnight       | Proteintech 12444-1-AP Lot 00075263              | IgG (H+L) Cross-Adsorbed Goat anti-Rabbit, Alexa Fluor™ 488                    | 1:200    | 10 minutes      | Invitrogen A11008 Lot 2743033 |
| 6     | COX11            | 1:200    | Overnight       | Invitrogen PA5-104519 Lot XC3547445A             | IgG (H+L) Cross-Adsorbed Goat anti-Rabbit, Alexa Fluor™ 488                    | 1:200    | 10 minutes      | Invitrogen A11008 Lot 2743033 |
| 6     | IDH3A            | 1:50     | 48 hours        | Santa Cruz sc-398021 Lot B1221 Clone A-10        | Goat anti-Mouse IgG1 Heavy Chain Secondary Antibody [DyLight 550]              | 1:200    | 10 minutes      | Novus NB7508R Lot D109323     |
| 7     | GAPDH            | 1:200    | Overnight       | Santa Cruz sc-47724 Clone 0411                   | Goat anti-Mouse IgG1 Heavy Chain Secondary Antibody [DyLight 550]              | 1:200    | 10 minutes      | Novus NB7508R Lot D109323     |
| 7     | OGDH             | 1:50     | Overnight       | Proteintech 66285-1-IG Clone 1H7A2               | Goat anti-Mouse IgG2b Heavy Chain Secondary Antibody [FITC]                    | 1:200    | 10 minutes      | Novus NB7520 Lot F15          |
| 8     | UQCQRQ           | 1:50     | Overnight       | Invitrogen PA5-106446                            | IgG (H+L) Cross-Adsorbed Goat anti-Rabbit, Alexa Fluor™ 488                    | 1:200    | 10 minutes      | Invitrogen A11008 Lot 2743033 |

| Panel | Primary Antibody | Dilution | Incubation Time | Catalog Information                               | Secondary Antibody                                                                      | Dilution | Incubation Time | Catalog Information              |
|-------|------------------|----------|-----------------|---------------------------------------------------|-----------------------------------------------------------------------------------------|----------|-----------------|----------------------------------|
| 8     | CD45             | 1:200    | Overnight       | Cell Signaling Technologies<br>13917T Clone D9M8I | Goat anti-Rabbit IgG<br>(H+L) Cross-Adsorbed<br>Secondary Antibody,<br>Alexa Fluor™ 555 | 1:200    | 10 minutes      | Invitrogen A21428<br>Lot 2527964 |
| 9     | Pan-Class I HLA  | 1:200    | Overnight       | Abcam ab70328 Clone EMR8-5                        | Goat anti-Mouse IgG1<br>Heavy Chain Secondary<br>Antibody [DyLight 550]                 | 1:200    | 10 minutes      | Novus NB7508R<br>Lot D109323     |
| 9     | PGAM2            | 1:50     | Overnight       | Invitrogen MA5-25671 Clone<br>OT14E9              | Goat anti-Mouse IgG2a<br>Heavy Chain Secondary<br>Antibody [FITC]                       | 1:200    | 10 minutes      | Novus<br>NB7515                  |
| 10    | PFKB4            | 1:200    | Overnight       | Invitrogen MA5-25024<br>Clone OT11C8              | Goat anti-Mouse IgG2a<br>Heavy Chain Secondary<br>Antibody [FITC]                       | 1:200    | 10 minutes      | Novus<br>NB7515                  |
| 10    | IRE1 $\alpha$    | 1:100    | Overnight       | Novus Biologicals<br>NB100-2323                   | Goat Anti-Rabbit IgG H&L<br>(Alexa Fluor® 555)<br>preadsorbed                           | 1:200    | 10 minutes      | Abcam<br>ab150086                |
